# Supplementary material
Source: publisher site journal article supplement (https://www.dovepress.com/article/226828)
Supplement: Supplementary file 1 [file get_supplementary_file.php]

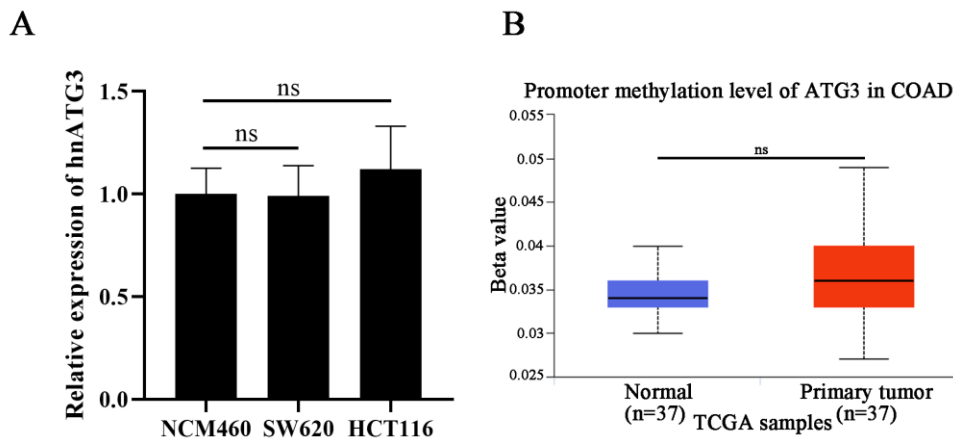

**Supplementary Figure 1 Post-transcriptional mechanisms account for the upregulation of ATG3 in colon cancer.**

**Notes:** (A) The comparable expression level of ATG3 hnRNA was observed among NCM460, SW620, and HCT116 cells indicated by qPCR assay. (B) The promoter methylation level is comparable between colon cancer and normal tissues demonstrated by online data from TCGA. **COAD: colon adenocarcinoma**, **ns** stands for no significant difference.

**A**

| miRNA          | GeneName | miRmap | microT | miRanda | AgoExpNum |
|----------------|----------|--------|--------|---------|-----------|
| hsa-miR-599    | ATG3     | 1[6.0] | 1[6.3] | 1[6.2]  | 6         |
| hsa-miR-431-5p | ATG3     | 1[6.0] | 1[6.2] | 1[6.3]  | 6         |
| hsa-miR-3611   | ATG3     | 1[4.0] | 1[6.3] | 0[0.0]  | 6         |
| hsa-miR-758-3p | ATG3     | 0[0.0] | 0[0.0] | 1[6.3]  | 6         |
| hsa-miR-584-5p | ATG3     | 1[4.0] | 1[6.1] | 0[0.0]  | 6         |
| hsa-miR-206    | ATG3     | 0[0.0] | 1[5.0] | 1[5.0]  | 5         |
| hsa-miR-204-5p | ATG3     | 0[0.0] | 0[0.0] | 1[5.0]  | 5         |
| hsa-miR-613    | ATG3     | 0[0.0] | 1[5.0] | 1[5.0]  | 5         |
| hsa-miR-1-3p   | ATG3     | 0[0.0] | 1[5.0] | 1[5.0]  | 5         |
| hsa-miR-410-3p | ATG3     | 0[0.0] | 1[5.0] | 1[4.0]  | 5         |

**B**

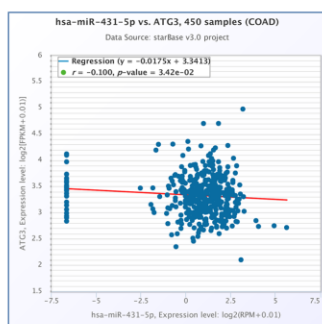

**C**

ONCOMiR  
WashU Pan-Cancer miRNome Atlas

There are 9 cancer types where survival is significantly associated with hsa-miR-431-5p

| miRNA Name     | Cancer Abbreviation | Log Rank P-value | Log Rank HR | Z-score | Upregulated in: | Decreased Log2 Mean Expression | Living Log2 Mean Expression | T-Test P-value | T-Test HR |
|----------------|---------------------|------------------|-------------|---------|-----------------|--------------------------------|-----------------------------|----------------|-----------|
| hsa-miR-431-5p | BLCA                | 1.15e-02         | 4.17e-01    | 2.825   | Decreased       | 3.86                           | 1.80                        | 3.27e-01       | 6.50e-01  |
| hsa-miR-431-5p | COAD                | 3.92e-02         | 8.60e-01    | 2.017   | Living          | 1.38                           | 1.53                        | 4.38e-01       | 7.57e-01  |
| hsa-miR-431-5p | HNSC                | 5.17e-03         | 6.65e-02    | 2.855   | Decreased       | 2.02                           | 1.63                        | 1.63e-02       | 1.86e-01  |
| hsa-miR-431-5p | KICH                | 5.45e-03         | 3.08e-01    | 1.887   | Decreased       | 2.45                           | 0.06                        | 3.49e-01       | 5.73e-01  |
| hsa-miR-431-5p | KIRC                | 1.97e-02         | 1.49e-01    | 2.661   | Decreased       | 0.29                           | 0.13                        | 1.15e-01       | 3.10e-01  |
| hsa-miR-431-5p | KIRP                | 9.12e-03         | 2.27e-01    | 3.237   | Decreased       | 0.13                           | 0.03                        | 1.34e-01       | 5.41e-01  |
| hsa-miR-431-5p | LGG                 | 5.03e-03         | 2.82e-03    | 3.130   | Decreased       | 0.56                           | 0.16                        | 1.30e-02       | 8.69e-02  |
| hsa-miR-431-5p | PRAD                | 2.48e-02         | 6.18e-01    | 3.082   | Decreased       | 0.26                           | 0.03                        | 3.96e-01       | 6.32e-01  |
| hsa-miR-431-5p | UCEC                | 1.66e-02         | 9.51e-01    | 2.748   | Decreased       | 2.94                           | 1.15                        | 1.92e-01       | 6.35e-01  |

**Supplementary Figure 2 Online data suggest that miR-431-5p may target ATG3 in colon cancer.**

**Notes:** (A) Starbase 2.0 analysis predicts that miR-431-5p might target ATG3 in colon cancer. (B) A negative correlation is indicated by data from Starbase 2.0. (C) miR-431-5p is a favorable indicator of prognosis in colon cancer demonstrating by the data from OncomiR database.

**A**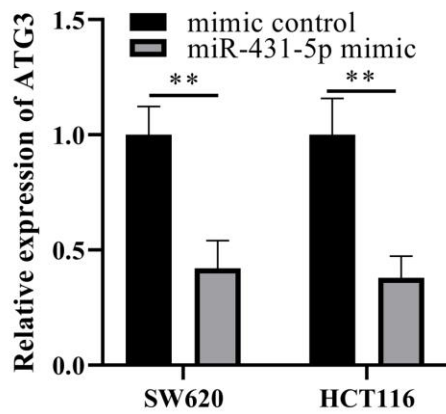**B**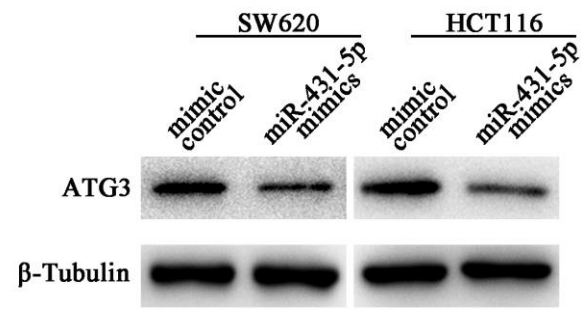

**Supplementary Figure 3 miR-431-5p can inhibit the level of ATG3 mRNA and protein in colon cancer.**

**Notes:** (A) miR-431-5p mimics significantly inhibit the level of ATG3 mRNA in SW480 and HCT116 cells indicated by qPCR assays. (B) miR-431-5p mimics significantly inhibit the level of ATG3 protein in SW480 and HCT116 cells indicated by western blot. \*\*stands for  $P < 0.01$
